# Supplementary material for: SARS-CoV-2 infection does not affect the outcome of patients with relapsed/refractory large B-cell lymphoma treated with CAR T-cell therapy
Source: Springer Nature journal article supplement (doi:10.1007/s00277-025-06425-8), 2025-06-01
Supplement: MOESM1 [file 277_2025_6425_MOESM1_ESM.docx]

**Supplementary Table 1** Management and outcomes of SARS-CoV-2 infections across different phases of the pandemic

| Characteristics | Date of infusion | Date of infection | Antiviral therapies | Number of vaccine dose for SARS-CoV-2 | Best response | Progression free survival, months | Overall survival,  months |
| --- | --- | --- | --- | --- | --- | --- | --- |
| Fourth wave of SARS-CoV-2 infections |  |  |  |  |  |  |  |
| Patient n° 1 | 22-Dec-20 | 22-Mar-2022 | Monoclonal antibodies | 3 doses after CAR-T infusion (last on 16-Nov-21) | CR | 39.8 | 39.8 |
| Patient n° 2 | 20-Dec-20 | 4-Jan-2022 | Remdesvir | 3 doses after CAR-T, dates not available | CR | 16.5 | 16.5 |
| Patient n° 3 | 15-Jan-21 | 8-Jan-2022 | None | 3 doses after CAR-T infusion (last on 22-Nov-21) | CR | 6.2 | 39 |
| Patient n° 4 | 28-Feb-22 | 9-Jan-2022 | None | 3 doses before (last on 15-Dec-21) and 1 after CAR-T infusion (last on 15-Mar-22) | CR | 25.4 | 25.4 |
| Patient n° 5 | 27-Aug-21 | 17-Mar-22  5-Apr-22 | Remdesvir  Remdesvir and casirivimab-imdevimab | 2 doses before and 1 after CAR-T infusion (last on Jan-22) | CR | 31.5 | 31.5 |
| Patient n° 6 | 14-Aug-20 | 6-Feb-22 | Remdesvir and evusheld | 3 doses after CAR-T infusion (last on 1-Dec-21) | CR | 44.1 | 44.1 |
| Patient n° 7 | 1-Jul-21 | 10-Jan-22 | Sotrovimab, remdesvir and paxlovid | 2 doses before and 1 after CAR-T infusion (last on 9-Nov-21) | CR | 4.9 | 33.4 |
| Patient n° 8 | 08-Aug-22 | 10-Mar-22 | Paxlovid | 2 doses before CAR-T infusion (last on 1-Dec-21) | CR | 11.2 | 20 |
| Patient n° 9 | 10-Nov-21 | 6-Jan-22 | Remdesvir | 2 doses before CAR-T infusion (last on 13-Jul-21) | PR | 29.0 | 29.0 |
| Patient n° 10 | 22-Jan-21 | 1-Jan-22 | Casirivimab-imdevimab | 3 doses after CAR-T infusion (last on 20-Nov-21) | CR | 3.0 | 3.0 |
| Patient n° 11 | 4-Aug-20 | 13-Jan-22 | None | 3 doses after CAR-T, dates not available | CR | 44.5 | 44.5 |
|  |  |  |  |  |  |  |  |
| Beyond the fourth wave of SARS-CoV-2 infections  Patient n° 12 | 18-Sep-23 | 27-Apr-23  13-May-23 | Paxlovid  Paxlovid | 4 doses before CAR-T infusion (last on 10-Jun-22) | CR | 4.0 | 4.0 |
| Patient n° 13 | 7-Jun-21 | 5-Dec-22  6-Dec-23 | Remdesvir  None | 4 doses after CAR-T infusion (last on 12-Jul-22) | CR | 34.2 | 34.2 |
| Patient n° 14 | 7-Nov-23 | 7-Dec-23 | Paxlovid | 3 doses before CAR-T infusion (last on 25-Jan-22) | CR | 4.8 | 4.8 |
| Patient n° 1 | 22-Dec-20 | 1-Aug-22 | None | 3 doses after CAR-T infusion (last on 16-Nov-21) | CR | 39.8 | 39.8 |
| Patient n° 15 | 16-May-22 | 25-Dec-23 | None | 2 doses before and 2 doses after CAR-T infusion (last on 10-May-23) | CR | 22.8 | 22.8 |
| Patient n° 16 | 22-Oct-21 | 2-Dec-22 | Paxlovid and then remdesvir in combination with paxlovid | 2 doses before and 2 doses after CAR-T infusion (last on 1-Aug-22) | CR | 29.7 | 29.7 |
| Patient n° 17 | 21-Dec-22 | 24-Jan-23 | Remdesvir | 2 doses before CAR-T infusion (last on Nov-22) | PR | 4.1 | 15.5 |
| Patient n° 4 | 28-Feb-22 | 29-Jul-22 | Evusheld | 3 doses before (last on 15-Dec-21) and 1 after CAR-T infusion (last on 15-Mar-22) | CR | 25.4 | 25.4 |
| Patient n° 5 | 27-Aug-21 | 19-Sep-22  7-Oct-23 | Remdesvir and evusheld  Monoclonal antibodies | 2 doses before and 1 after CAR-T infusion (last on Jan-22) | CR | 31.5 | 31.5 |
| Patient n° 18 | 4-Aug-21 | 4-Sep-22 | None | 2 doses after CAR-T infusion (last on 8-Dec-21) | CR | 6.3 | 32.3 |
| Patient n° 19 | 19-Dec-22 | 29-Sep-22 | Paxlovid | 3 doses before (last on 27-Sep-21) and 1 after CAR-T infusion (last on 23-Oct-23) | CR | 12.2 | 15.6 |
| Patient n° 20 | 5-Apr-23 | 7-Mar-23 | Remdesvir | 4 doses before (last on 1-Sep-22) and 1 after CAR-T infusion (last on 1-Nov-23) | CR | 10.6 | 10.6 |
| Patient n° 21 | 14-Aug-20 | 10-Sep-22 | Paxlovid | 3 doses after CAR-T infusion (last on 1-Dec-21) | CR | 44.1 | 44.1 |
| Patient n° 22 | 14-Feb-23 | 22-Sep-22 | Paxlovid | 3 doses before CAR-T infusion (last on 18-Jan-22) | CR | 13.7 | 13.7 |
| Patient n° 23 | 12-Jan-22 | 18-Jun-22  30-Oct-22 | Paxlovid and sotrovimab  None | 3 doses before CAR-T infusion (last on 9-Dec-21) | CR | 26.9 | 26.9 |
| Patient n° 24 | 15-Mar-23 | 27-Dec-22 | Paxlovid | 2 doses before CAR-T infusion (last on 14-Aug-21) | CR | 12.7 | 12.7 |
| Patient n° 25 | 9-Mar-23 | 27-Dec-22 | Paxlovid | 3 doses before CAR-T infusion (last on 27-Nov-21) | CR | 5.8 | 12.9 |
| Patient n° 26 | 17-Jul-23 | 12-Dec-23 | Paxlovid | None | CR | 8.6 | 8.6 |
| Patient n° 27 | 10-Oct-23 | 14-Sep-23  5-Dec-23 | Paxlovid  Paxlovid | 4 doses before CAR-T infusion (last on 24-May-22) | CR | 3.6 | 5.6 |
| Patient n° 28 | 9-May-22 | 24-Oct-22  12-Dec-23 | Remdesvir  Paxlovid | 3 doses before CAR-T infusion (last on 7-Nov-21) | PR | 23.0 | 23.0 |
| Patient n° 29 | 26-Jan-23 | 1-Dec-23 | Paxlovid | 4 doses before CAR-T infusion (last on 15-Dec-22) | CR | 14.3 | 14.3 |
| Patient n° 9 | 10-Nov-21 | 15-Jun-22 | Remdesvir | 2 doses before CAR-T infusion (last on 13-Jul-21) | PR | 29.0 | 29.0 |
| Patient n° 30 | 28-Nov-22 | 20-Dec-22 | Paxlovid and then remdesvir in combination with paxlovid | 3 doses before and 2 doses after CAR-T infusion (last on 16-Nov-23) | CR | 16.3 | 16.3 |
| Patient n° 31 | 3-May-21 | 13-Jul-22 | Molnupiravir, evusheld, remdesivir and paxlovid | 3 doses after CAR-T infusion (last on 21-Jun-22) | CR | 35.4 | 35.4 |
| Patient n° 32 | 23-Mar-23 | 30-Dec-22  19-Jun-23 | Molnupiravir  Paxlovid | 4 doses before CAR-T infusion (last on 1-Sep-22) | CR | 12.4 | 12.4 |
| Patient n° 33 | 1-Dec-20 | 6-Jul-22 | None | 3 doses after CAR-T infusion (last on 13-Dec-21) | CR | 24.5 | 40.5 |
| Patient n° 34 | 15-Mar-21 | 23-Mar-23 | None | No number of doses and dates available | CR | 37.0 | 37.0 |
| Patient n° 35 | 11-Oct-23 | 13-Nov-23 | Paxlovid | 4 doses before CAR-T infusion (last on 5-Oct-22) | CR | 5.7 | 5.7 |
| Patient n° 36 | 19-Sep-23 | 24-Sep-23 | Paxlovid | 4 doses before CAR-T infusion (last on 29-Mar-22) | CR | 3.3 | 6.4 |
| Patient n° 37 | 10-May-21 | 2-Nov-22 | None | 1 dose before and 1 dose after CAR-T infusion (last on Sep-21) | CR | 35.2 | 35.2 |
| Patient n° 38 | 28-Sep-22 | 27-Jul-22 | None | 3 doses before CAR-T infusion (last on 11-Oct-21) | CR | 18.3 | 18.3 |
